# Supplementary material
Source: publisher figshare collection journal article supplement (https://gsapubs.figshare.com/ndownloader/files/23319158)
Supplement: Supplementary file 1 [file 23319158]

Heard, A.W., and Dauphas, N., 2020, Constraints on the coevolution of oxic and sulfidic ocean iron sinks from Archean–Paleoproterozoic iron isotope records: *Geology*, v. 48, <https://doi.org/10.1130/G46951.1>

### **Supplementary Information**

This supplementary text provides:

- i.) Additional discussion of the question of sample bias in  $\delta^{56}\text{Fe}$  records.
- ii.) Lists of references used in compiling  $\delta^{56}\text{Fe}$  and  $\delta^{34}\text{S}$  records for the Archean–Paleoproterozoic.

The compiled datasets used in this study are published in the EarthChem library. URL: <https://doi.org/10.1594/IEDA/111446>

### **FIDELITY OF THE ANCIENT FE ISOTOPE RECORD**

The Archean–Paleoproterozoic  $\delta^{56}\text{Fe}$  record is notably sparse when compared to traditional stable isotope proxies, including the  $\delta^{34}\text{S}$  data we have compiled. However, interpretations of the  $\delta^{56}\text{Fe}$  record have in the past extrapolated the findings of relatively localized sampling in time and space, in order to develop models with broad implications for the marine Fe cycle and its relevance to the evolution of Earth surface redox conditions (*e.g.* Rouxel et al., 2005; Planavsky et al., 2012; Rolison et al., 2018; Czaja et al., 2018). Such interpretations all require that the existing  $\delta^{56}\text{Fe}$  records of IF and pyrite provide a representative sampling of these sediment types. In our study, sample bias concerns are arguably greater because of how they might affect subtler trends in the  $\delta^{56}\text{Fe}$  record. Therefore, we identify three main ways in which sample bias could affect our interpretations of  $\delta^{56}\text{Fe}$  records, and suggest mitigating factors in each case.

#### *Heterogeneous sampling in time and space*

The first type of sampling bias we consider is that of inhomogeneous sampling of the IF and pyrite  $\delta^{56}\text{Fe}$  records in time and space. The patchy nature of both records, often with long gaps containing little to no data throughout the 2000 Ma time span we consider, makes it clear that rocks of all ages have not been sampled equally. This is unavoidable because rocks of Archean age are preserved on few cratons, and in the case of IFs, because their geological occurrence is thought to be sporadic and linked to periods of high hydrothermal  $\text{Fe}^{2+}$  supply driven by the occurrence of oceanic large igneous provinces (Isley and Abbott, 1999; Bekker et al., 2010; Konhauser et al., 2017). Care must be taken not to over-extrapolate interpretations to include spans of Earth history where no data is available. In order to address this possible bias, we choose not to interpolate  $\delta^{56}\text{Fe}$  records across unsampled time periods, and base our

interpretations of possible covariations between  $\delta^{56}\text{Fe}_{\text{py}}$ ,  $\delta^{56}\text{Fe}_{\text{IF}}$  and sulfur records by binning by age and only comparing time bins which contain data. In addition to time binning, we note that that  $\delta^{56}\text{Fe}$  data for both IF and pyrites of a given age, in addition to more extensively sample S records, often include samples from the same sedimentary basins or successions. In particular, late Neoarchean and early Paleoproterozoic sedimentary records are very well sampled in the West Australian Hamersley and South African Transvaal Supergroups. This is where  $\delta^{56}\text{Fe}$  records are the most complete, and therefore we are confident that the compilations we present capture the time period around the GOE as it affected marine Fe cycling in these locations. Whilst the possibility exists that the Hamersley and Transvaal sub-basins are not representative of late Neoarchean to early Paleoproterozoic geochemistry, such a concern is equally applicable to the numerous interpretations of global biogeochemical change that have been formulated principally making use of samples from these very well sampled regions.

Similarly, sampling is sparse in the Meso- and Paleo-Archean.  $\delta^{56}\text{Fe}$  records, where they exist, are available for IF and pyrites from closely associated formations, and therefore the covariations we present may still be descriptive of the shared evolution of Fe, S, and  $\text{O}_2$  cycling at these times and locations (Planavsky et al., 2014; Busigny et al., 2017; Eickmann et al., 2018; Ossa Ossa et al., 2018). For example, around 2950 Ma, elevated  $\delta^{56}\text{Fe}_{\text{py}}$ , negative  $\delta^{56}\text{Fe}_{\text{IF}}$ , and a large range in  $\delta^{34}\text{S}$  are all consistent with a proposed Mesoarchean environment with increased S availability in addition to multiple lines of evidence for free  $\text{O}_2$ , including Cr and Mo isotopic data (Crowe et al., 2013; Planavsky et al., 2014; Eickmann et al., 2018; Ossa Ossa et al., 2018). The fact that this record is restricted to the Pongola Supergroup of South Africa means we cannot make broader interpretations about the global ocean redox state or the entirety of the Mesoarchean. However, these highly localized data still provide meaningful information about the interaction of the Pre-GOE Fe, S, and  $\text{O}_2$  cycles. We suggest that they can serve as a case study for how  $\delta^{56}\text{Fe}$  records might be expected to change in the transition from an anoxic, low S environment to one more replete in  $\text{O}_2$  and S, as is thought to have occurred on a global scale during the GOE. We cannot rule out that the Pongola Supergroup represents a biased sampling of Mesoarchean global biogeochemistry, capturing a localized environment in which oxidants and sulfur accumulated in quantities well in excess of the global average for the Mesoarchean. This should be testable in the future through extensive geochemical studies of other Mesoarchean sedimentary successions of similar age, including  $\delta^{56}\text{Fe}$  studies.

### *Preservation bias in the rock record*

The second form of sample bias we consider is whether the types of rocks preserved at Earth's surface may have changed over time, such that trends in  $\delta^{56}\text{Fe}$  records could reflect changes in post-depositional alteration of rocks or preferential destruction of certain lithofacies. For example, could the general trend of decreasing  $\delta^{56}\text{Fe}_{\text{IF}}$  from the Eoarchean through to the GOE, noted previously by Czaja et al. (2018), reflect geological processes that led to the preferential

loss of low  $\delta^{56}\text{Fe}$  IF over time, such that only high  $\delta^{56}\text{Fe}_{\text{IF}}$  values are preserved in the earliest portion of the rock record? This question is particularly pertinent for the IF record, because there is an observed change in the dominant style of IF deposited in through the earlier Archean versus the latest Neoproterozoic and Paleoproterozoic, with older, more volcanically-influenced and laterally restricted Algoma style IF giving way to basin-scale Superior style IF deposition that occurred on more stable passive continental margins (Bekker et al., 2010; Konhauser et al., 2017). Algoma style IFs typically display positive, and less variable,  $\delta^{56}\text{Fe}$  values, whereas Superior style IF show more larger ranges of  $\delta^{56}\text{Fe}$ , with negative values being common (Dauphas et al., 2016; Czaja et al., 2018). Gradual removal of ferric oxyhydroxide precipitates with positive  $\delta^{56}\text{Fe}$  from the ocean is thought to leave the residual dissolved  $\text{Fe}^{2+}$  with complementary negative  $\delta^{56}\text{Fe}$  values (Rouxel et al., 2005; Planavsky et al., 2012). Therefore, the  $\delta^{56}\text{Fe}$  range seen in Superior style IF could be explained by their deposition further from hydrothermal Fe sources than Algoma style IF, with the former precipitating from an  $\text{Fe}^{2+}$  reservoir that had greater opportunity to be depleted by partial oxidation during upwelling.

In light of this distinction in  $\delta^{56}\text{Fe}$  systematics of different styles of IF, a preservation bias favoring one style of IF over another could theoretically lead to spurious trends in the observed  $\delta^{56}\text{Fe}_{\text{IF}}$  record. The preservation bias required to reproduce our observed  $\delta^{56}\text{Fe}_{\text{IF}}$  record must comprise of two factors: i.) Preferential destruction of younger Algoma style IF with almost entirely positive  $\delta^{56}\text{Fe}$  in the late Neoproterozoic to early Paleoproterozoic, and ii.) Preferential destruction of low  $\delta^{56}\text{Fe}$  Superior style IF in the Eoarchean through to the early Neoproterozoic. Such a preservation bias would imply that Superior style IF were deposited throughout the Archean but only preserved later in Earth history. We consider i.) to be plausible, because volcanically associated Algoma style IF were not deposited on stable craton margins and therefore their destruction by tectonic processes would appear to be likely relative to the that of Superior style IF. In addition, early high mantle potential temperatures may have enabled formation of hotter, more buoyant Eoarchean oceanic crust that was not so easily destroyed by subduction, aiding the survival of early Algoma style IF. However, we do not consider it geologically plausible that expansive Superior style IF could have been entirely eradicated from the first 1000 Ma of the geological record, in order to create the dearth of lower- $\delta^{56}\text{Fe}$  IF seen in the early Archean, because this would require preferential preservation of oceanic crustal material relative to stable passive margin sedimentary sequences, a phenomenon which is not known otherwise in the geological record.

Theoretically, we could contrive various scenarios that explain each trend in the  $\delta^{56}\text{Fe}_{\text{IF}}$  and  $\delta^{56}\text{Fe}_{\text{py}}$  records entirely via preservation biases in an unchanging ocean geochemical regime. However, we would argue that these scenarios generally require non-uniformitarian geological processes. By contrast, we consider the interpretations we can make for  $\delta^{56}\text{Fe}$  records by taking them at face value do not present such internal inconsistencies. Our preferred interpretation of these data can and should be subject to debate and testing by greater sampling of gaps in the geological record. However, we believe that sampling biases are not so severe as to completely

disqualify meaningful interpretation of the  $\delta^{56}\text{Fe}$  record as it relates to the interaction of the Fe, S and  $\text{O}_2$  cycles.

### *Hydrothermal or metamorphic overprinting of $\delta^{56}\text{Fe}$ records*

The third way in which sample biases could affect our interpretation of the  $\delta^{56}\text{Fe}$  record is if it were dominated by hydrothermal or metamorphic overprinting as opposed to primary sedimentary signatures. For the sake of discussion, we consider early diagenetic processes such as microbial dissimilatory  $\text{Fe}^{3+}$  reduction (DIR) to be ‘primary’ processes inasmuch as they occur in unconsolidated sedimentary piles still in diffusive exchange with the marine water column, and are biogeochemical rather than metamorphic processes. A forgiving aspect of  $\delta^{56}\text{Fe}$  systematics is that they are generally resistant to metamorphic overprinting, as Fe is quite immobile during metamorphism (Dauphas et al., 2016). This is epitomized by the preservation of chemical sedimentary  $\delta^{56}\text{Fe}$  signatures in ~3800 Ma IF from the Isua and Nuvvuagittuq supracrustal belts, which have experienced metamorphism up to amphibolite facies (Dauphas et al., 2004, 2007a, 2007b; Czaja et al., 2013). Despite this,  $\delta^{56}\text{Fe}$  in these rocks clearly distinguishes them from banded gneisses with igneous protoliths. The high Fe contents of IF mean that large quantities of Fe must be lost or gained in order to significantly alter their  $\delta^{56}\text{Fe}$  values. Metamorphic recrystallization can redistribute Fe isotopes among constituent minerals, but high temperature equilibrium fractionations occurring in these reactions are small relative to the ‰-scale low temperature primary fractionations recorded in the bulk composition of these rocks (Dauphas et al., 2016). In addition, late-altering metamorphic fluids are expected to have formed in equilibrium with a more oxidizing atmosphere than the one under which ancient IF formed, such that metamorphic fluids are unlikely to reduce IF-hosted iron, which would be required for large scale Fe loss from IF because  $\text{Fe}^{3+}$  is fluid immobile.

Some ancient pyrites may also have been influenced by post-depositional hydrothermal and/or metamorphic processes. At first glance, pyrite has a high Fe content and is highly insoluble, which might suggest that metamorphic alteration to  $\delta^{56}\text{Fe}_{\text{py}}$  is unlikely. However, we do not omit the possibility that pyrite can form as a secondary phase during hydrothermal and metamorphic processes. Textural studies suggests that some pyrites in the well-studied Mt McRae shale were dissolved and reprecipitated in coarse-grained nodules and laminae, with internally homogenized  $\delta^{34}\text{S}$  (Takegawa et al., 1998). Furthermore, O isotope thermometry of pyrite-rimming quartz grains in this formation suggest homogenization at 100-240 °C, which supports a role for hydrothermal alteration in this pyrite reprecipitation (Haruna et al., 2003). However, this dissolution-reprecipitation of pyrite appears to have occurred in a closed system (Takegawa et al., 1998). In many cases, Archean-Paleoproterozoic pyrites have internal crystalline structure indicative of secondary grain growth, but the deformation of primary shale laminae around such pyrite grains argue for a primary sedimentary origin and subsequent closed system recrystallization (Rouxel et al., 2005). Again, in such cases a large quantity of new Fe, or

significant loss of primary Fe, would be required to significantly overprint primary sedimentary  $\delta^{56}\text{Fe}_{\text{py}}$  signatures. While hydrothermally-influenced dissolution-reprecipitation played an important role in homogenization and textural evolution of these ancient pyrites, it is unlikely to have affected their bulk  $\delta^{56}\text{Fe}$  composition, particularly given the high temperatures at which these reactions occurred. Crucially, to produce the trends through time seen in  $\delta^{56}\text{Fe}_{\text{py}}$  records, hydrothermal/metamorphic alteration of pyrites would need to be both pervasive, and undergo a systematic change in its effect on  $\delta^{56}\text{Fe}$  through time. Whilst this is a difficult proposition to entirely rule out, it appeals to non-uniformitarian processes and therefore we consider it unlikely as a driver of global  $\delta^{56}\text{Fe}$  trends through time. More fundamentally, our data compilation relies on good analytical practice on the part of workers generating geochemical data, both for  $\delta^{56}\text{Fe}$  and  $\delta^{34}\text{S}$  records. Such good practice should include screening for hydrothermally or metamorphically altered samples on the basis of mineralogical and trace elemental systematics, as is demonstrated through Mn/Fe systematics by Busigny et al. (2017).

## Supplementary Information References

- Bekker, A., Slack, J.F., Planavsky, N., Krapež, B., Hofmann, A., Konhauser, K.O., and Rouxel, O.J., 2010, Iron Formation: The Sedimentary Product of a Complex Interplay among Mantle, Tectonic, Oceanic, and Biospheric Processes: *Economic Geology*, v. 105, p. 467–508, doi:10.2113/gsecongeo.105.3.467.
- Busigny, V., Marin-Carbonne, J., Muller, E., Cartigny, P., Rollion-Bard, C., Assayag, N., and Philippot, P., 2017, Iron and sulfur isotope constraints on redox conditions associated with the 3.2Ga barite deposits of the Mapepe Formation (Barberton Greenstone Belt, South Africa): *Geochimica et Cosmochimica Acta*, v. 210, p. 247–266, doi:10.1016/j.gca.2017.05.002.
- Crowe, S.A., Døssing, L.N., Beukes, N.J., Bau, M., Kruger, S.J., Frei, R., and Canfield, D.E., 2013, Atmospheric oxygenation three billion years ago: *Nature*, v. 501, p. 535, doi:10.1038/nature12426.
- Czaja, A.D., Johnson, C.M., Beard, B.L., Roden, E.E., Li, W., and Moorbath, S., 2013, Biological Fe oxidation controlled deposition of banded iron formation in the ca. 3770Ma Isua Supracrustal Belt (West Greenland): *Earth and Planetary Science Letters*, v. 363, p. 192–203, doi:10.1016/j.epsl.2012.12.025.
- Czaja, A.D., Van Kranendonk, M.J., Beard, B.L., and Johnson, C.M., 2018, A multistage origin for Neoproterozoic layered hematite-magnetite iron formation from the Weld Range, Yilgarn Craton, Western Australia: *Chemical Geology*, v. 488, p. 125–137, doi:10.1016/j.chemgeo.2018.04.019.
- Dauphas, N., Cates, N.L., Mojzsis, S.J., and Busigny, V., 2007a, Identification of chemical sedimentary protoliths using iron isotopes in the > 3750 Ma Nuvvuagittuq supracrustal belt, Canada: *Earth and Planetary Science Letters*, v. 254, p. 358–376, doi:10.1016/j.epsl.2006.11.042.
- Dauphas, N., John, S.G., and Rouxel, O., 2016, Iron Isotope Systematics: Reviews in Mineralogy and Geochemistry, v. 82, p. 415–510.
- Dauphas, N., van Zuilen, M., Busigny, V., Lepland, A., Wadhwa, M., and Janney, P.E., 2007b, Iron isotope, major and trace element characterization of early Archean supracrustal rocks from SW Greenland: Protolith identification and metamorphic overprint: *Geochimica et Cosmochimica Acta*, v. 71, p. 4745–4770, doi:10.1016/j.gca.2007.07.019.
- Dauphas, N., Zuilen, M. van, Wadhwa, M., Davis, A.M., Marty, B., and Janney, P.E., 2004, Clues from Fe Isotope Variations on the Origin of Early Archean BIFs from Greenland: *Science*, v. 306, p. 2077–2080, doi:10.1126/science.1104639.

- Eickmann, B., Hofmann, A., Wille, M., Bui, T.H., Wing, B.A., and Schoenberg, R., 2018, Isotopic evidence for oxygenated Mesoarchaeon shallow oceans: *Nature Geoscience*, v. 11, p. 133, doi:10.1038/s41561-017-0036-x.
- Haruna, M., Hanamuro, T., Uyeda, K., Fujimaki, H., and Ohmoto, H., 2003, Chemical, Isotopic, and Fluid Inclusion Evidence for the Hydrothermal Alteration of the Footwall Rocks of the BIF-Hosted Iron Ore Deposits in the Hamersley District, Western Australia: *Resource Geology*, v. 53, p. 75–88, doi:10.1111/j.1751-3928.2003.tb00160.x.
- Isley, A.E., and Abbott, D.H., 1999, Plume-related mafic volcanism and the deposition of banded iron formation: *Journal of Geophysical Research: Solid Earth*, v. 104, p. 15461–15477, doi:10.1029/1999JB900066.
- Kakegawa, T., Kawai, H., and Ohmoto, H., 1998, Origins of pyrites in the ~2.5 Ga Mt. McRae Shale, the Hamersley District, Western Australia: *Geochimica et Cosmochimica Acta*, v. 62, p. 3205–3220, doi:10.1016/S0016-7037(98)00229-4.
- Konhauser, K.O. et al., 2017, Iron formations: A global record of Neoarchean to Palaeoproterozoic environmental history: *Earth-Science Reviews*, v. 172, p. 140–177, doi:10.1016/j.earscirev.2017.06.012.
- Ossa Ossa, F., Hofmann, A., Wille, M., Spangenberg, J.E., Bekker, A., Poulton, S.W., Eickmann, B., and Schoenberg, R., 2018, Aerobic iron and manganese cycling in a redox-stratified Mesoarchean epicontinental sea: *Earth and Planetary Science Letters*, v. 500, p. 28–40, doi:10.1016/j.epsl.2018.07.044.
- Planavsky, N.J. et al., 2014, Evidence for oxygenic photosynthesis half a billion years before the Great Oxidation Event: *Nature Geoscience*, v. 7, p. 283–286, doi:10.1038/ngeo2122.
- Planavsky, N., Rouxel, O.J., Bekker, A., Hofmann, A., Little, C.T.S., and Lyons, T.W., 2012, Iron isotope composition of some Archean and Proterozoic iron formations: *Geochimica et Cosmochimica Acta*, v. 80, p. 158–169, doi:10.1016/j.gca.2011.12.001.
- Rolison, J.M., Stirling, C.H., Middag, R., Gault-Ringold, M., George, E., and Rijkenberg, M.J.A., 2018, Iron isotope fractionation during pyrite formation in a sulfidic Precambrian ocean analogue: *Earth and Planetary Science Letters*, v. 488, p. 1–13, doi:10.1016/j.epsl.2018.02.006.
- Rouxel, O.J., Bekker, A., and Edwards, K.J., 2005, Iron Isotope Constraints on the Archean and Paleoproterozoic Ocean Redox State: *Science*, v. 307, p. 1088–1091, doi:10.1126/science.1105692.





## LIST OF REFERENCES USED IN DATA COMPILATIONS

### *IF $\delta^{56}\text{Fe}$ record*

- Busigny, V., Marin-Carbonne, J., Muller, E., Cartigny, P., Rollion-Bard, C., Assayag, N., and Philippot, P., 2017, Iron and sulfur isotope constraints on redox conditions associated with the 3.2Ga barite deposits of the Mapepe Formation (Barberton Greenstone Belt, South Africa): *Geochimica et Cosmochimica Acta*, v. 210, p. 247–266, doi:10.1016/j.gca.2017.05.002.
- Czaja, A.D., Johnson, C.M., Beard, B.L., Roden, E.E., Li, W., and Moorbath, S., 2013, Biological Fe oxidation controlled deposition of banded iron formation in the ca. 3770Ma Isua Supracrustal Belt (West Greenland): *Earth and Planetary Science Letters*, v. 363, p. 192–203, doi:10.1016/j.epsl.2012.12.025.
- Czaja, A.D., Van Kranendonk, M.J., Beard, B.L., and Johnson, C.M., 2018, A multistage origin for Neoproterozoic layered hematite-magnetite iron formation from the Weld Range, Yilgarn Craton, Western Australia: *Chemical Geology*, v. 488, p. 125–137, doi:10.1016/j.chemgeo.2018.04.019.
- Dauphas, N., Cates, N.L., Mojzsis, S.J., and Busigny, V., 2007a, Identification of chemical sedimentary protoliths using iron isotopes in the > 3750 Ma Nuvvuagittuq supracrustal belt, Canada: *Earth and Planetary Science Letters*, v. 254, p. 358–376, doi:10.1016/j.epsl.2006.11.042.
- Dauphas, N., van Zuilen, M., Busigny, V., Lepland, A., Wadhwa, M., and Janney, P.E., 2007b, Iron isotope, major and trace element characterization of early Archean supracrustal rocks from SW Greenland: Protolith identification and metamorphic overprint: *Geochimica et Cosmochimica Acta*, v. 71, p. 4745–4770, doi:10.1016/j.gca.2007.07.019.
- Dauphas, N., Zuilen, M. van, Wadhwa, M., Davis, A.M., Marty, B., and Janney, P.E., 2004, Clues from Fe Isotope Variations on the Origin of Early Archean BIFs from Greenland: *Science*, v. 306, p. 2077–2080, doi:10.1126/science.1104639.
- Haugaard, R., Pecoits, E., Lalonde, S., Rouxel, O., and Konhauser, K., 2016, The Joffre banded iron formation, Hamersley Group, Western Australia: Assessing the palaeoenvironment through detailed petrology and chemostratigraphy: *Precambrian Research*, v. 273, p. 12–37, doi:10.1016/j.precamres.2015.10.024.
- Heimann, A., Johnson, C.M., Beard, B.L., Valley, J.W., Roden, E.E., Spicuzza, M.J., and Beukes, N.J., 2010, Fe, C, and O isotope compositions of banded iron formation carbonates demonstrate a major role for dissimilatory iron reduction in ~2.5 Ga marine environments: *Earth and Planetary Science Letters*, v. 294, p. 8–18, doi:10.1016/j.epsl.2010.02.015.

- Kurzweil, F., Wille, M., Gantert, N., Beukes, N.J., and Schoenberg, R., 2016, Manganese oxide shuttling in pre-GOE oceans – evidence from molybdenum and iron isotopes: *Earth and Planetary Science Letters*, v. 452, p. 69–78, doi:10.1016/j.epsl.2016.07.013.
- Li, W., Beard, B.L., and Johnson, C.M., 2015, Biologically recycled continental iron is a major component in banded iron formations: *Proceedings of the National Academy of Sciences of the United States of America*, v. 112, p. 8193–8198, doi:10.1073/pnas.1505515112.
- Li, W., Czaja, A.D., Van Kranendonk, M.J., Beard, B.L., Roden, E.E., and Johnson, C.M., 2013, An anoxic, Fe(II)-rich, U-poor ocean 3.46 billion years ago: *Geochimica et Cosmochimica Acta*, v. 120, p. 65–79, doi:10.1016/j.gca.2013.06.033.
- Planavsky, N.J. et al., 2014, Evidence for oxygenic photosynthesis half a billion years before the Great Oxidation Event: *Nature Geoscience*, v. 7, p. 283–286, doi:10.1038/ngeo2122.
- Planavsky, N., Rouxel, O.J., Bekker, A., Hofmann, A., Little, C.T.S., and Lyons, T.W., 2012, Iron isotope composition of some Archean and Proterozoic iron formations: *Geochimica et Cosmochimica Acta*, v. 80, p. 158–169, doi:10.1016/j.gca.2011.12.001.
- Planavsky, N., Rouxel, O., Bekker, A., Shapiro, R., Fralick, P., and Knudsen, A., 2009, Iron-oxidizing microbial ecosystems thrived in late Paleoproterozoic redox-stratified oceans: *Earth and Planetary Science Letters*, v. 286, p. 230–242, doi:10.1016/j.epsl.2009.06.033.
- Rouxel, O.J., Bekker, A., and Edwards, K.J., 2005, Iron Isotope Constraints on the Archean and Paleoproterozoic Ocean Redox State: *Science*, v. 307, p. 1088–1091, doi:10.1126/science.1105692.
- Satkoski, A.M., Beukes, N.J., Li, W., Beard, B.L., and Johnson, C.M., 2015, A redox-stratified ocean 3.2 billion years ago: *Earth and Planetary Science Letters*, v. 430, p. 43–53, doi:10.1016/j.epsl.2015.08.007.
- Smith, A.J.B., Beukes, N.J., Gutzmer, J., Czaja, A.D., Johnson, C.M., and Nhleko, N., 2017, Oncoidal granular iron formation in the Mesoarchean Pongola Supergroup, southern Africa: Textural and geochemical evidence for biological activity during iron deposition: *Geobiology*, v. 15, p. 731–749, doi:10.1111/gbi.12248.
- Teixeira, N.L., Caxito, F.A., Rosière, C.A., Pecoits, E., Vieira, L., Frei, R., Sial, A.N., and Poitrasson, F., 2017, Trace elements and isotope geochemistry (C, O, Fe, Cr) of the Cauê iron formation, Quadrilátero Ferrífero, Brazil: Evidence for widespread microbial dissimilatory iron reduction at the Archean/Paleoproterozoic transition: *Precambrian Research*, v. 298, p. 39–55, doi:10.1016/j.precamres.2017.05.009.
- Thibon, F., Blichert-Toft, J., Tsikos, H., Foden, J., Albalat, E., and Albareda, F., 2019, Dynamics of oceanic iron prior to the Great Oxygenation Event: *Earth and Planetary Science Letters*, v. 506, p. 360–370, doi:10.1016/j.epsl.2018.11.016.

Tsikos, H., Matthews, A., Erel, Y., and Moore, J.M., 2010, Iron isotopes constrain biogeochemical redox cycling of iron and manganese in a Palaeoproterozoic stratified basin: *Earth and Planetary Science Letters*, v. 298, p. 125–134, doi:10.1016/j.epsl.2010.07.032.

Yamaguchi, K.E., Johnson, C.M., Beard, B.L., and Ohmoto, H., 2005, Biogeochemical cycling of iron in the Archean–Paleoproterozoic Earth: Constraints from iron isotope variations in sedimentary rocks from the Kaapvaal and Pilbara Cratons: *Chemical Geology*, v. 218, p. 135–169, doi:10.1016/j.chemgeo.2005.01.020.

#### *Pyrite $\delta^{56}\text{Fe}$ record*

Archer, C., and Vance, D., 2006, Coupled Fe and S isotope evidence for Archean microbial Fe(III) and sulfate reduction: *Geology*, v. 34, p. 153–156, doi:10.1130/G22067.1.

Busigny, V., Marin-Carbonne, J., Muller, E., Cartigny, P., Rollion-Bard, C., Assayag, N., and Philippot, P., 2017, Iron and sulfur isotope constraints on redox conditions associated with the 3.2Ga barite deposits of the Mapepe Formation (Barberton Greenstone Belt, South Africa): *Geochimica et Cosmochimica Acta*, v. 210, p. 247–266, doi:10.1016/j.gca.2017.05.002.

Eickmann, B., Hofmann, A., Wille, M., Bui, T.H., Wing, B.A., and Schoenberg, R., 2018, Isotopic evidence for oxygenated Mesoarchaeon shallow oceans: *Nature Geoscience*, v. 11, p. 133, doi:10.1038/s41561-017-0036-x.

Hofmann, A., Bekker, A., Rouxel, O., Rumble, D., and Master, S., 2009, Multiple sulphur and iron isotope composition of detrital pyrite in Archaean sedimentary rocks: A new tool for provenance analysis: *Earth and Planetary Science Letters*, v. 286, p. 436–445, doi:10.1016/j.epsl.2009.07.008.

Rouxel, O.J., Bekker, A., and Edwards, K.J., 2005, Iron Isotope Constraints on the Archean and Paleoproterozoic Ocean Redox State: *Science*, v. 307, p. 1088–1091, doi:10.1126/science.1105692.

#### *Sedimentary sulfide $\delta^{34}\text{S}$ record*

Bekker, A., Holland, H.D., Wang, P.-L., Rumble, D., Stein, H.J., Hannah, J.L., Coetzee, L.L., and Beukes, N.J., 2004, Dating the rise of atmospheric oxygen: *Nature*, v. 427, p. 117–120, doi:10.1038/nature02260.

Busigny, V., Marin-Carbonne, J., Muller, E., Cartigny, P., Rollion-Bard, C., Assayag, N., and Philippot, P., 2017, Iron and sulfur isotope constraints on redox conditions associated

- with the 3.2 Ga barite deposits of the Mapepe Formation (Barberton Greenstone Belt, South Africa): *Geochimica et Cosmochimica Acta*, v. 210, p. 247–266, doi:10.1016/j.gca.2017.05.002.
- Cameron, E.M., and Garrels, R.M., 1980, Geochemical compositions of some Precambrian shales from the Canadian Shield: *Chemical Geology*, v. 28, p. 181–197, doi:10.1016/0009-2541(80)90046-7.
- Carrigan, W.J., and Cameron, E.M., 1991, Petrological and stable isotope studies of carbonate and sulfide minerals from the Gunflint Formation, Ontario: evidence for the origin of early Proterozoic iron-formation: *Precambrian Research*, v. 52, p. 347–380, doi:10.1016/0301-9268(91)90088-R.
- Cates, N.L., and Mojzsis, S.J., 2006, Chemical and isotopic evidence for widespread Eoarchean metasedimentary enclaves in southern West Greenland: *Geochimica et Cosmochimica Acta*, v. 70, p. 4229–4257, doi:10.1016/j.gca.2006.05.014.
- Eickmann, B., Hofmann, A., Wille, M., Bui, T.H., Wing, B.A., and Schoenberg, R., 2018, Isotopic evidence for oxygenated Mesoarchean shallow oceans: *Nature Geoscience*, v. 11, p. 133, doi:10.1038/s41561-017-0036-x.
- Farquhar, J., Bao, H., and Thiemens, M., 2000, Atmospheric Influence of Earth's Earliest Sulfur Cycle: *Science*, v. 289, p. 756–758, doi:10.1126/science.289.5480.756.
- Farquhar, J., Peters, M., Johnston, D.T., Strauss, H., Masterson, A., Wiechert, U., and Kaufman, A.J., 2007, Isotopic evidence for Mesoarchean anoxia and changing atmospheric sulphur chemistry: *Nature*, v. 449, p. 706–709, doi:10.1038/nature06202.
- Guo, Q. et al., 2009, Reconstructing Earth's surface oxidation across the Archean-Proterozoic transition: *Geology*, v. 37, p. 399–402, doi:10.1130/G25423A.1.
- Hofmann, A., Bekker, A., Rouxel, O., Rumble, D., and Master, S., 2009, Multiple sulphur and iron isotope composition of detrital pyrite in Archaean sedimentary rocks: A new tool for provenance analysis: *Earth and Planetary Science Letters*, v. 286, p. 436–445, doi:10.1016/j.epsl.2009.07.008.
- Hou, K., Li, Y., and Wan, D., 2007, Constraints on the Archean atmospheric oxygen and sulfur cycle from mass-independent sulfur records from Anshan-Benxi BIFs, Liaoning Province, China: *Science in China Series D: Earth Sciences*, v. 50, p. 1471–1478, doi:10.1007/s11430-007-0106-9.
- Jamieson, J.W., Wing, B.A., Hannington, M.D., and Farquhar, J., 2006, Evaluating Isotopic Equilibrium Among Sulfide Mineral Pairs in Archean Ore Deposits: Case Study From The Kidd Creek Vms Deposit, Ontario, Canada: *Economic Geology*, v. 101, p. 1055–1061, doi:10.2113/gsecongeo.101.5.1055.

- Johnston, D.T., Poulton, S.W., Fralick, P.W., Wing, B.A., Canfield, D.E., and Farquhar, J., 2006, Evolution of the oceanic sulfur cycle at the end of the Paleoproterozoic: *Geochimica et Cosmochimica Acta*, v. 70, p. 5723–5739, doi:10.1016/j.gca.2006.08.001.
- Kamber, B.S., and Whitehouse, M.J., 2007, Micro-scale sulphur isotope evidence for sulphur cycling in the late Archean shallow ocean: *Geobiology*, v. 5, p. 5–17, doi:10.1111/j.1472-4669.2006.00091.x.
- Kaufman, A.J., Johnston, D.T., Farquhar, J., Masterson, A.L., Lyons, T.W., Bates, S., Anbar, A.D., Arnold, G.L., Garvin, J., and Buick, R., 2007, Late Archean Biospheric Oxygenation and Atmospheric Evolution: *Science*, v. 317, p. 1900–1903, doi:10.1126/science.1138700.
- Marin-Carbonne, J., Rollion-Bard, C., Bekker, A., Rouxel, O., Agangi, A., Cavalazzi, B., Wohlgemuth-Ueberwasser, C.C., Hofmann, A., and McKeegan, K.D., 2014, Coupled Fe and S isotope variations in pyrite nodules from Archean shale: *Earth and Planetary Science Letters*, v. 392, p. 67–79, doi:10.1016/j.epsl.2014.02.009.
- Melezhik, V.A., Grinenko, L.N., and Fallick, A.E., 1998, 2000-Ma sulphide concretions from the 'Productive' Formation of the Pechenga Greenstone Belt, NW Russia: genetic history based on morphological and isotopic evidence: *Chemical Geology*, v. 148, p. 61–94, doi:10.1016/S0009-2541(98)00021-7.
- Mojzsis, S.J., Coath, C.D., Greenwood, J.P., McKeegan, K.D., and Harrison, T.M., 2003, Mass-independent isotope effects in Archean (2.5 to 3.8 Ga) sedimentary sulfides determined by ion microprobe analysis: *Geochimica et Cosmochimica Acta*, v. 67, p. 1635–1658, doi:10.1016/S0016-7037(03)00059-0.
- Ohmoto, H., Watanabe, Y., Ikemi, H., Poulson, S.R., and Taylor, B.E., 2006, Sulphur isotope evidence for an oxic Archaean atmosphere: *Nature*, v. 442, p. 908–911, doi:10.1038/nature05044.
- Ono, S., Beukes, N.J., and Rumble, D., 2009a, Origin of two distinct multiple-sulfur isotope compositions of pyrite in the 2.5Ga Klein Naute Formation, Griqualand West Basin, South Africa: *Precambrian Research*, v. 169, p. 48–57, doi:10.1016/j.precamres.2008.10.012.
- Ono, S., Beukes, N.J., Rumble, D., and Fogel, M.L., 2006, Early evolution of atmospheric oxygen from multiple-sulfur and carbon isotope records of the 2.9 Ga Mozaan Group of the Pongola Supergroup, Southern Africa: *South African Journal of Geology*, v. 109, p. 97–108, doi:10.2113/gssajg.109.1-2.97.
- Ono, S., Eigenbrode, J.L., Pavlov, A.A., Kharecha, P., Rumble, D., Kasting, J.F., and Freeman, K.H., 2003, New insights into Archean sulfur cycle from mass-independent sulfur isotope

- records from the Hamersley Basin, Australia: *Earth and Planetary Science Letters*, v. 213, p. 15–30, doi:10.1016/S0012-821X(03)00295-4.
- Ono, S., Kaufman, A.J., Farquhar, J., Sumner, D.Y., and Beukes, N.J., 2009b, Lithofacies control on multiple-sulfur isotope records and Neoarchean sulfur cycles: *Precambrian Research*, v. 169, p. 58–67, doi:10.1016/j.precamres.2008.10.013.
- Ossa Ossa, F., Eickmann, B., Hofmann, A., Planavsky, N.J., Asael, D., Pambo, F., and Bekker, A., 2018, Two-step deoxygenation at the end of the Paleoproterozoic Lomagundi Event: *Earth and Planetary Science Letters*, v. 486, p. 70–83, doi:10.1016/j.epsl.2018.01.009.
- Papineau, D., Mojzsis, S.J., and Schmitt, A.K., 2007, Multiple sulfur isotopes from Paleoproterozoic Huronian interglacial sediments and the rise of atmospheric oxygen: *Earth and Planetary Science Letters*, v. 255, p. 188–212, doi:10.1016/j.epsl.2006.12.015.
- Partridge, M.A., Golding, S.D., Baublys, K.A., and Young, E., 2008, Pyrite paragenesis and multiple sulfur isotope distribution in late Archean and early Paleoproterozoic Hamersley Basin sediments: *Earth and Planetary Science Letters*, v. 272, p. 41–49, doi:10.1016/j.epsl.2008.03.051.
- Philippot, P., Zuilen, M.V., Lepot, K., Thomazo, C., Farquhar, J., and Kranendonk, M.J.V., 2007, Early Archean Microorganisms Preferred Elemental Sulfur, Not Sulfate: *Science*, v. 317, p. 1534–1537, doi:10.1126/science.1145861.
- Poulton, S.W., Fralick, P.W., and Canfield, D.E., 2004, The transition to a sulphidic ocean ~ 1.84 billion years ago: *Nature*, v. 431, p. 173–177, doi:10.1038/nature02912.
- Scott, C.T., Bekker, A., Reinhard, C.T., Schnetger, B., Krapež, B., Rumble, D., and Lyons, T.W., 2011, Late Archean euxinic conditions before the rise of atmospheric oxygen: *Geology*, v. 39, p. 119–122, doi:10.1130/G31571.1.
- Scott, C., Wing, B.A., Bekker, A., Planavsky, N.J., Medvedev, P., Bates, S.M., Yun, M., and Lyons, T.W., 2014, Pyrite multiple-sulfur isotope evidence for rapid expansion and contraction of the early Paleoproterozoic seawater sulfate reservoir: *Earth and Planetary Science Letters*, v. 389, p. 95–104, doi:10.1016/j.epsl.2013.12.010.
- Shen, Y., Farquhar, J., Masterson, A., Kaufman, A.J., and Buick, R., 2009, Evaluating the role of microbial sulfate reduction in the early Archean using quadruple isotope systematics: *Earth and Planetary Science Letters*, v. 279, p. 383–391, doi:10.1016/j.epsl.2009.01.018.
- Strauss, H., and Moore, T., 1992, Abundances and Isotopic Compositions of Carbon and Sulfur Species in Whole Rock and Kerogen Samples: In J. Schopf and C. Klein (Eds.), *The Proterozoic Biosphere: A Multidisciplinary Study* (pp. 709–798). Cambridge: Cambridge University Press. doi:10.1017/CBO9780511601064.019

- Strauss, H., 2002, The Isotopic Composition of Precambrian Sulphides – Seawater Chemistry and Biological Evolution: In W. Altermann and P. L. Corcoran (Eds.), *Precambrian Sedimentary Environments: A Modern Approach to Ancient Depositional Systems* (pp. 67-105). International Association of Sedimentologists. doi:10.1002/9781444304312
- Strauss, H., and Beukes, N.J., 1996, Carbon and sulfur isotopic compositions of organic carbon and pyrite in sediments from the Transvaal Supergroup, South Africa: *Precambrian Research*, v. 79, p. 57–71, doi:10.1016/0301-9268(95)00088-7.
- Thomazo, C., Ader, M., Farquhar, J., and Philippot, P., 2009, Methanotrophs regulated atmospheric sulfur isotope anomalies during the Mesoarchean (Tumbiana Formation, Western Australia): *Earth and Planetary Science Letters*, v. 279, p. 65–75, doi:10.1016/j.epsl.2008.12.036.
- Ueno, Y., Ono, S., Rumble, D., and Maruyama, S., 2008, Quadruple sulfur isotope analysis of ca. 3.5Ga Dresser Formation: New evidence for microbial sulfate reduction in the early Archean: *Geochimica et Cosmochimica Acta*, v. 72, p. 5675–5691, doi:10.1016/j.gca.2008.08.026.
- Watanabe, Y., Naraoka, H., Wronkiewicz, D.J., Condie, K.C., and Ohmoto, H., 1997, Carbon, nitrogen, and sulfur geochemistry of Archean and Proterozoic shales from the Kaapvaal Craton, South Africa: *Geochimica et Cosmochimica Acta*, v. 61, p. 3441–3459, doi:10.1016/S0016-7037(97)00164-6.
- Whitehouse, M.J., Kamber, B.S., Fedo, C.M., and Lepland, A., 2005, Integrated Pb- and S-isotope investigation of sulphide minerals from the early Archaean of southwest Greenland: *Chemical Geology*, v. 222, p. 112–131, doi:10.1016/j.chemgeo.2005.06.004.
- Yamaguchi (2002) PhD thesis, 485 pages, Pennsylvania State University
- Zerkle, A.L., Claire, M.W., Domagal-Goldman, S.D., Farquhar, J., and Poulton, S.W., 2012, A bistable organic-rich atmosphere on the Neoarchaeon Earth: *Nature Geoscience*, v. 5, p. 359–363, doi:10.1038/ngeo1425.
- Zhelezinskaia, I., Kaufman, A.J., Farquhar, J., and Cliff, J., 2014, Large sulfur isotope fractionations associated with Neoarchean microbial sulfate reduction: *Science*, v. 346, p. 742–744, doi:10.1126/science.1256211.
